# Supplementary material for: Time-Resolved and Tissue-Specific Systems Analysis of the Pathogenesis of Insulin Resistance
Source: PLoS One. 2010 Jan 21;5(1):e8817. doi: 10.1371/journal.pone.0008817 (PMC2809107; doi:10.1371/journal.pone.0008817)

**Figure S1**

## LEGEND

**Data columns in gene box:**

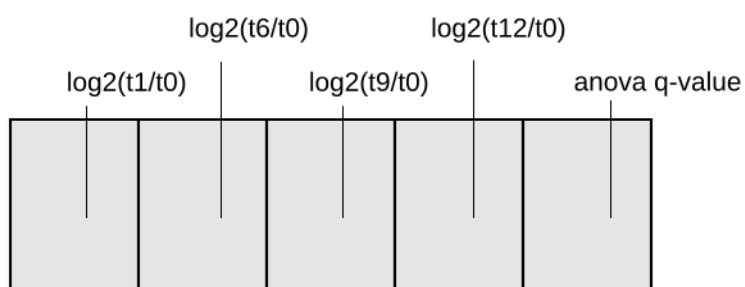

**Fold change coloring:**

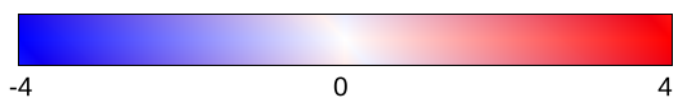

**q-value coloring:**

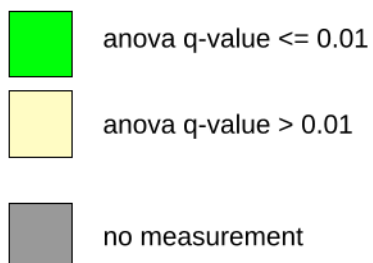

Liver

↓ Glycolysis  
↓ Gluconeogenesis

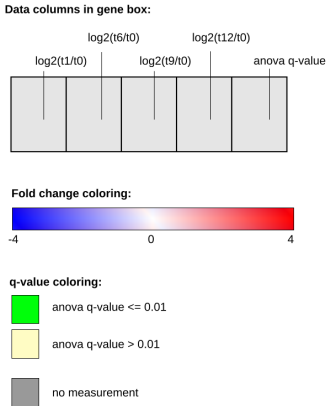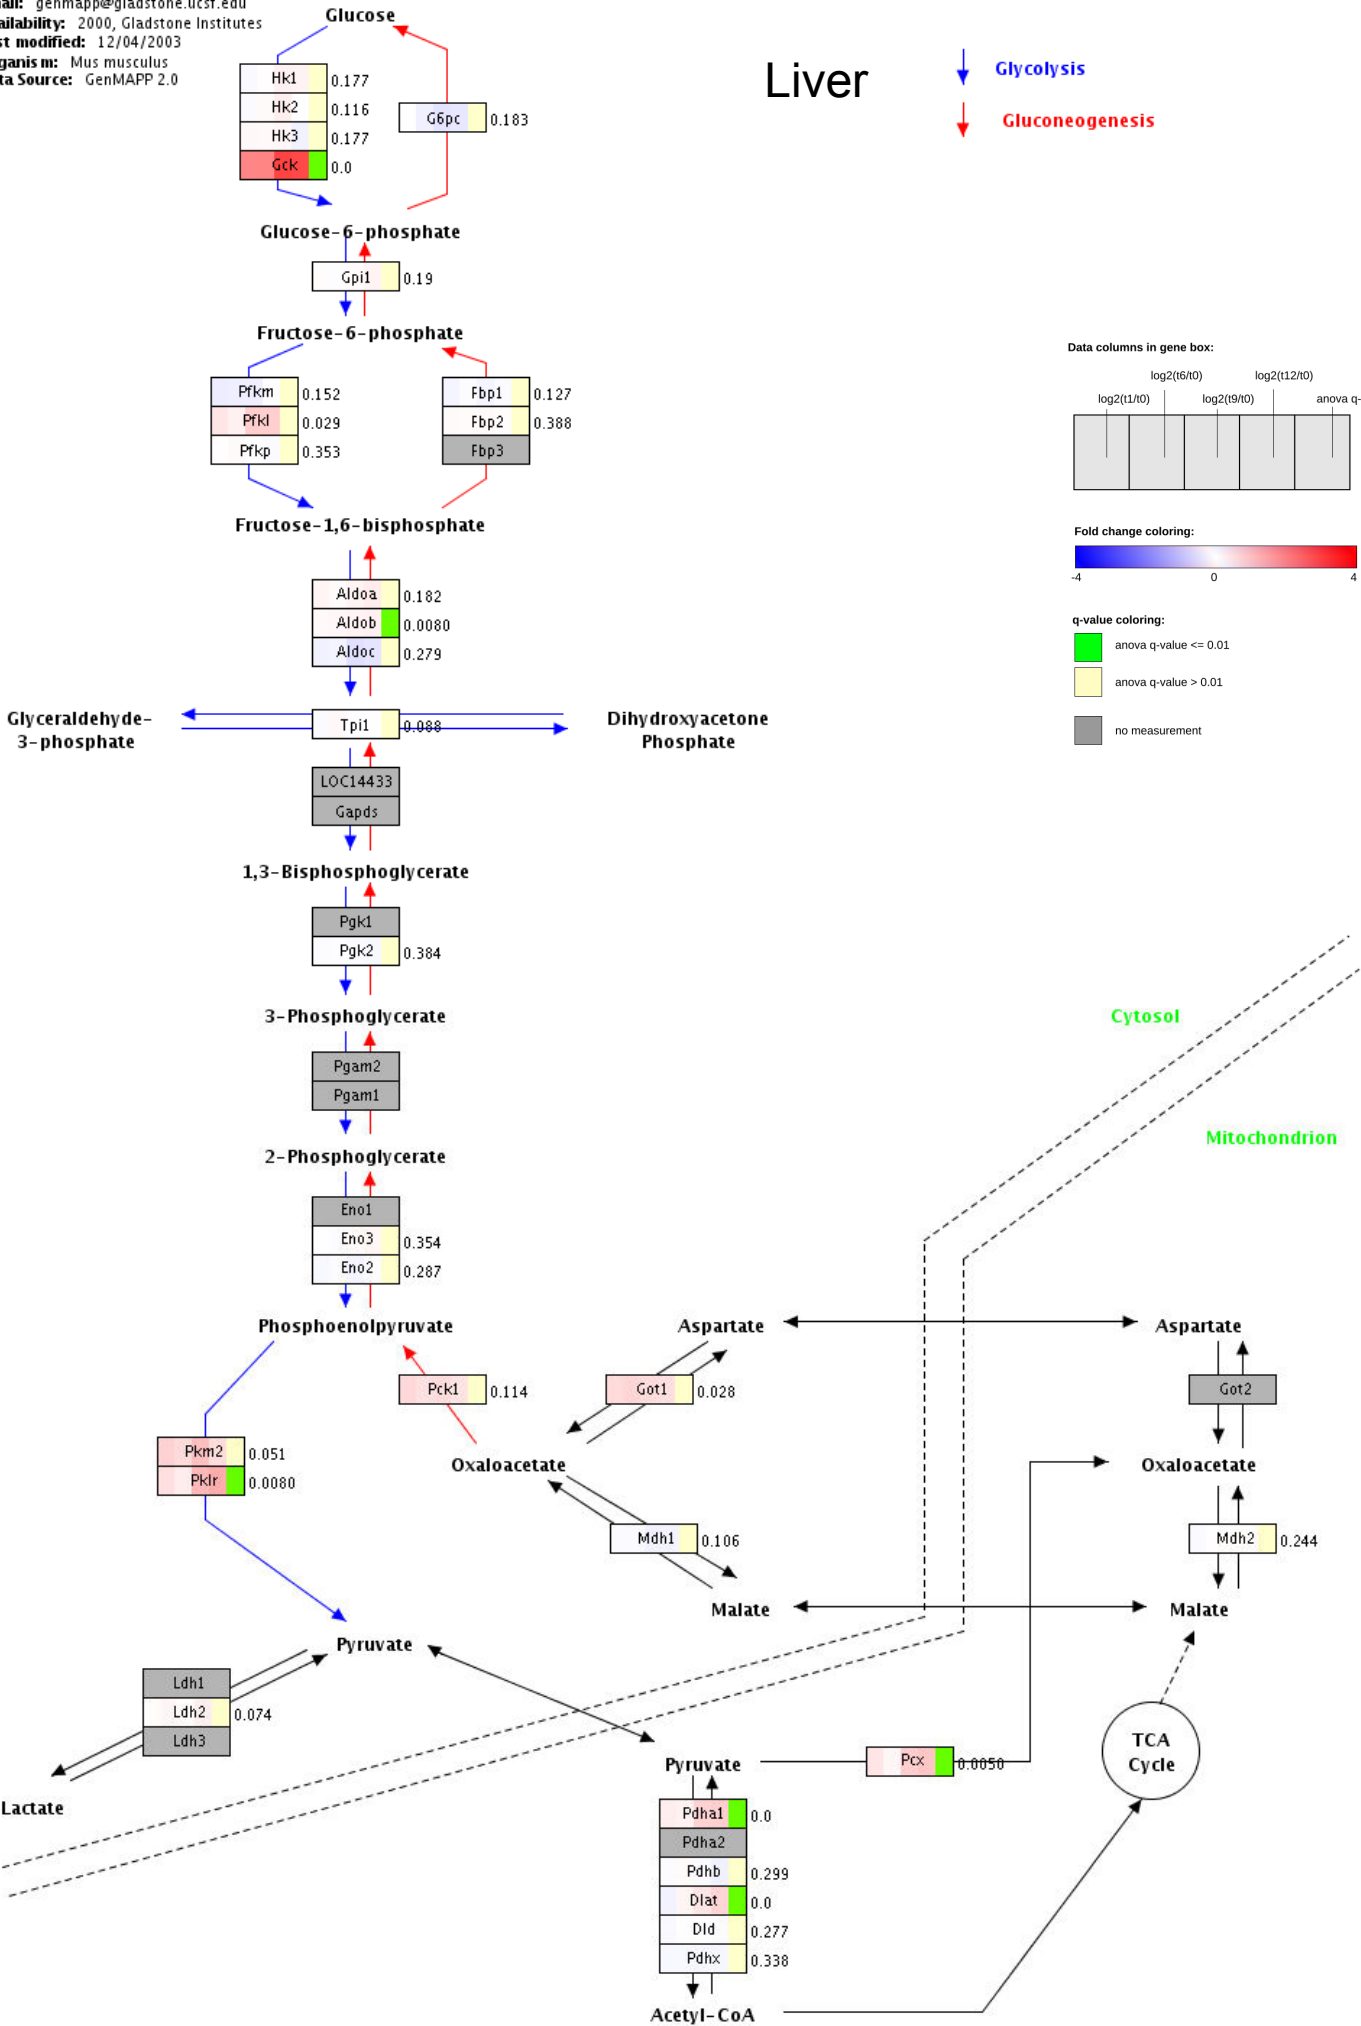

Muscle

↓ Glycolysis  
↓ Gluconeogenesis

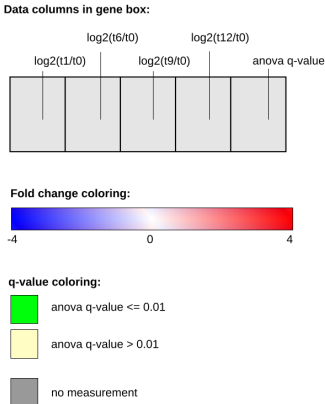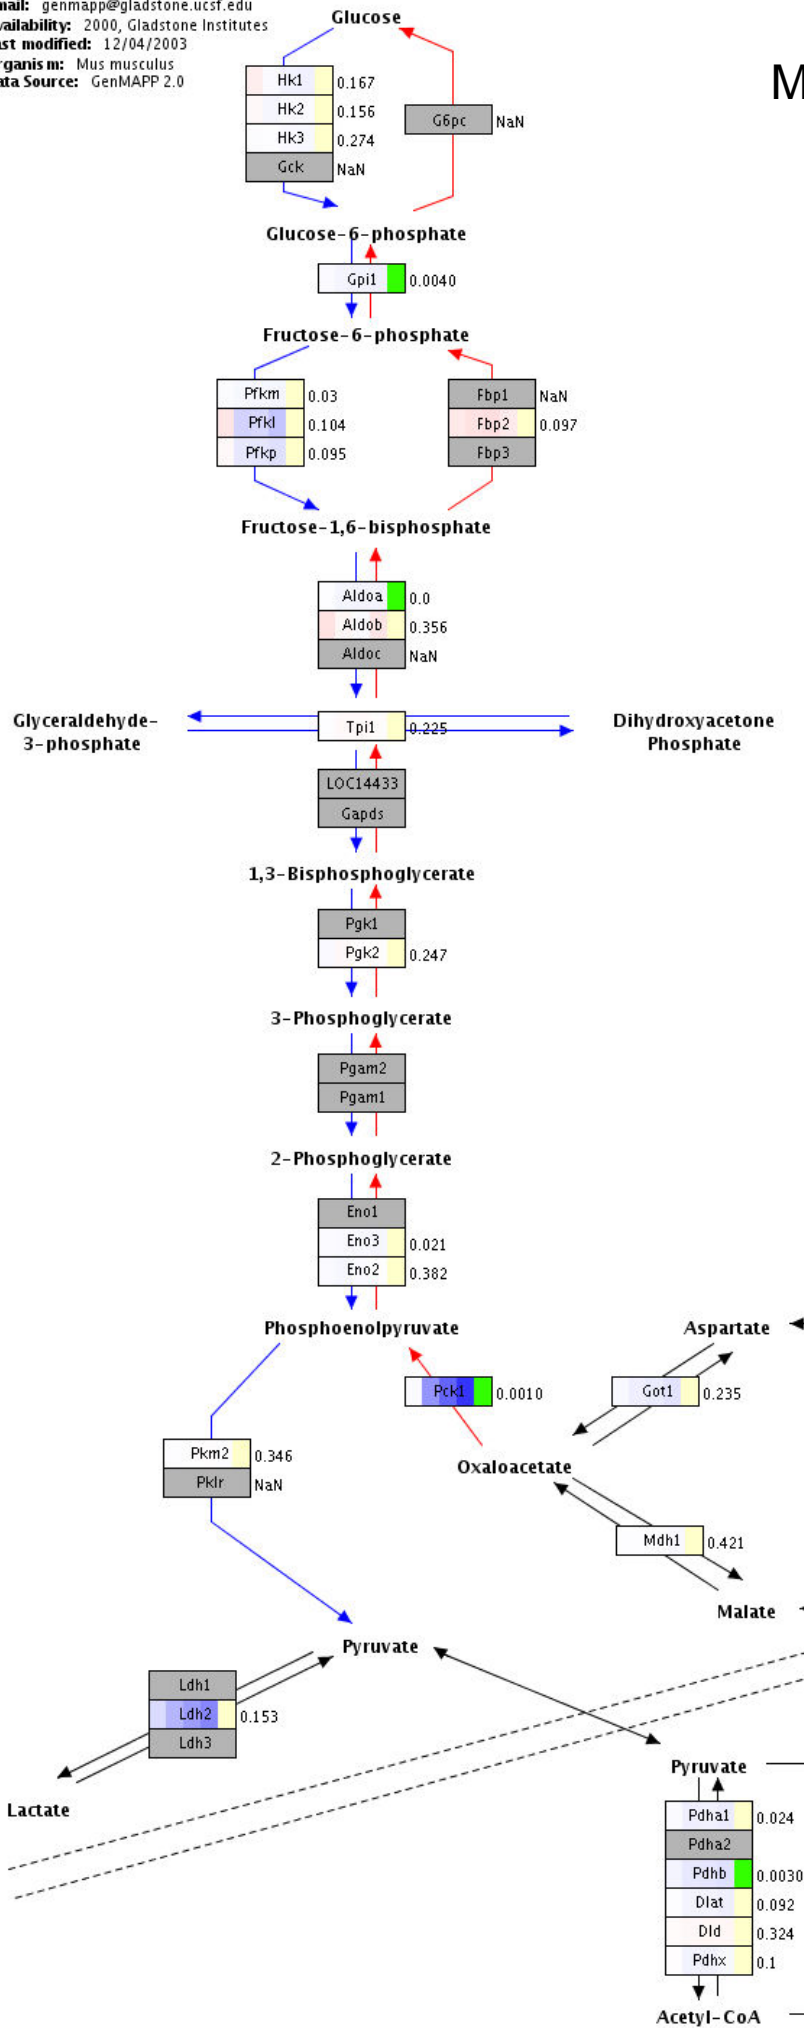

WAT

↓ Glycolysis  
 ↓ Gluconeogenesis

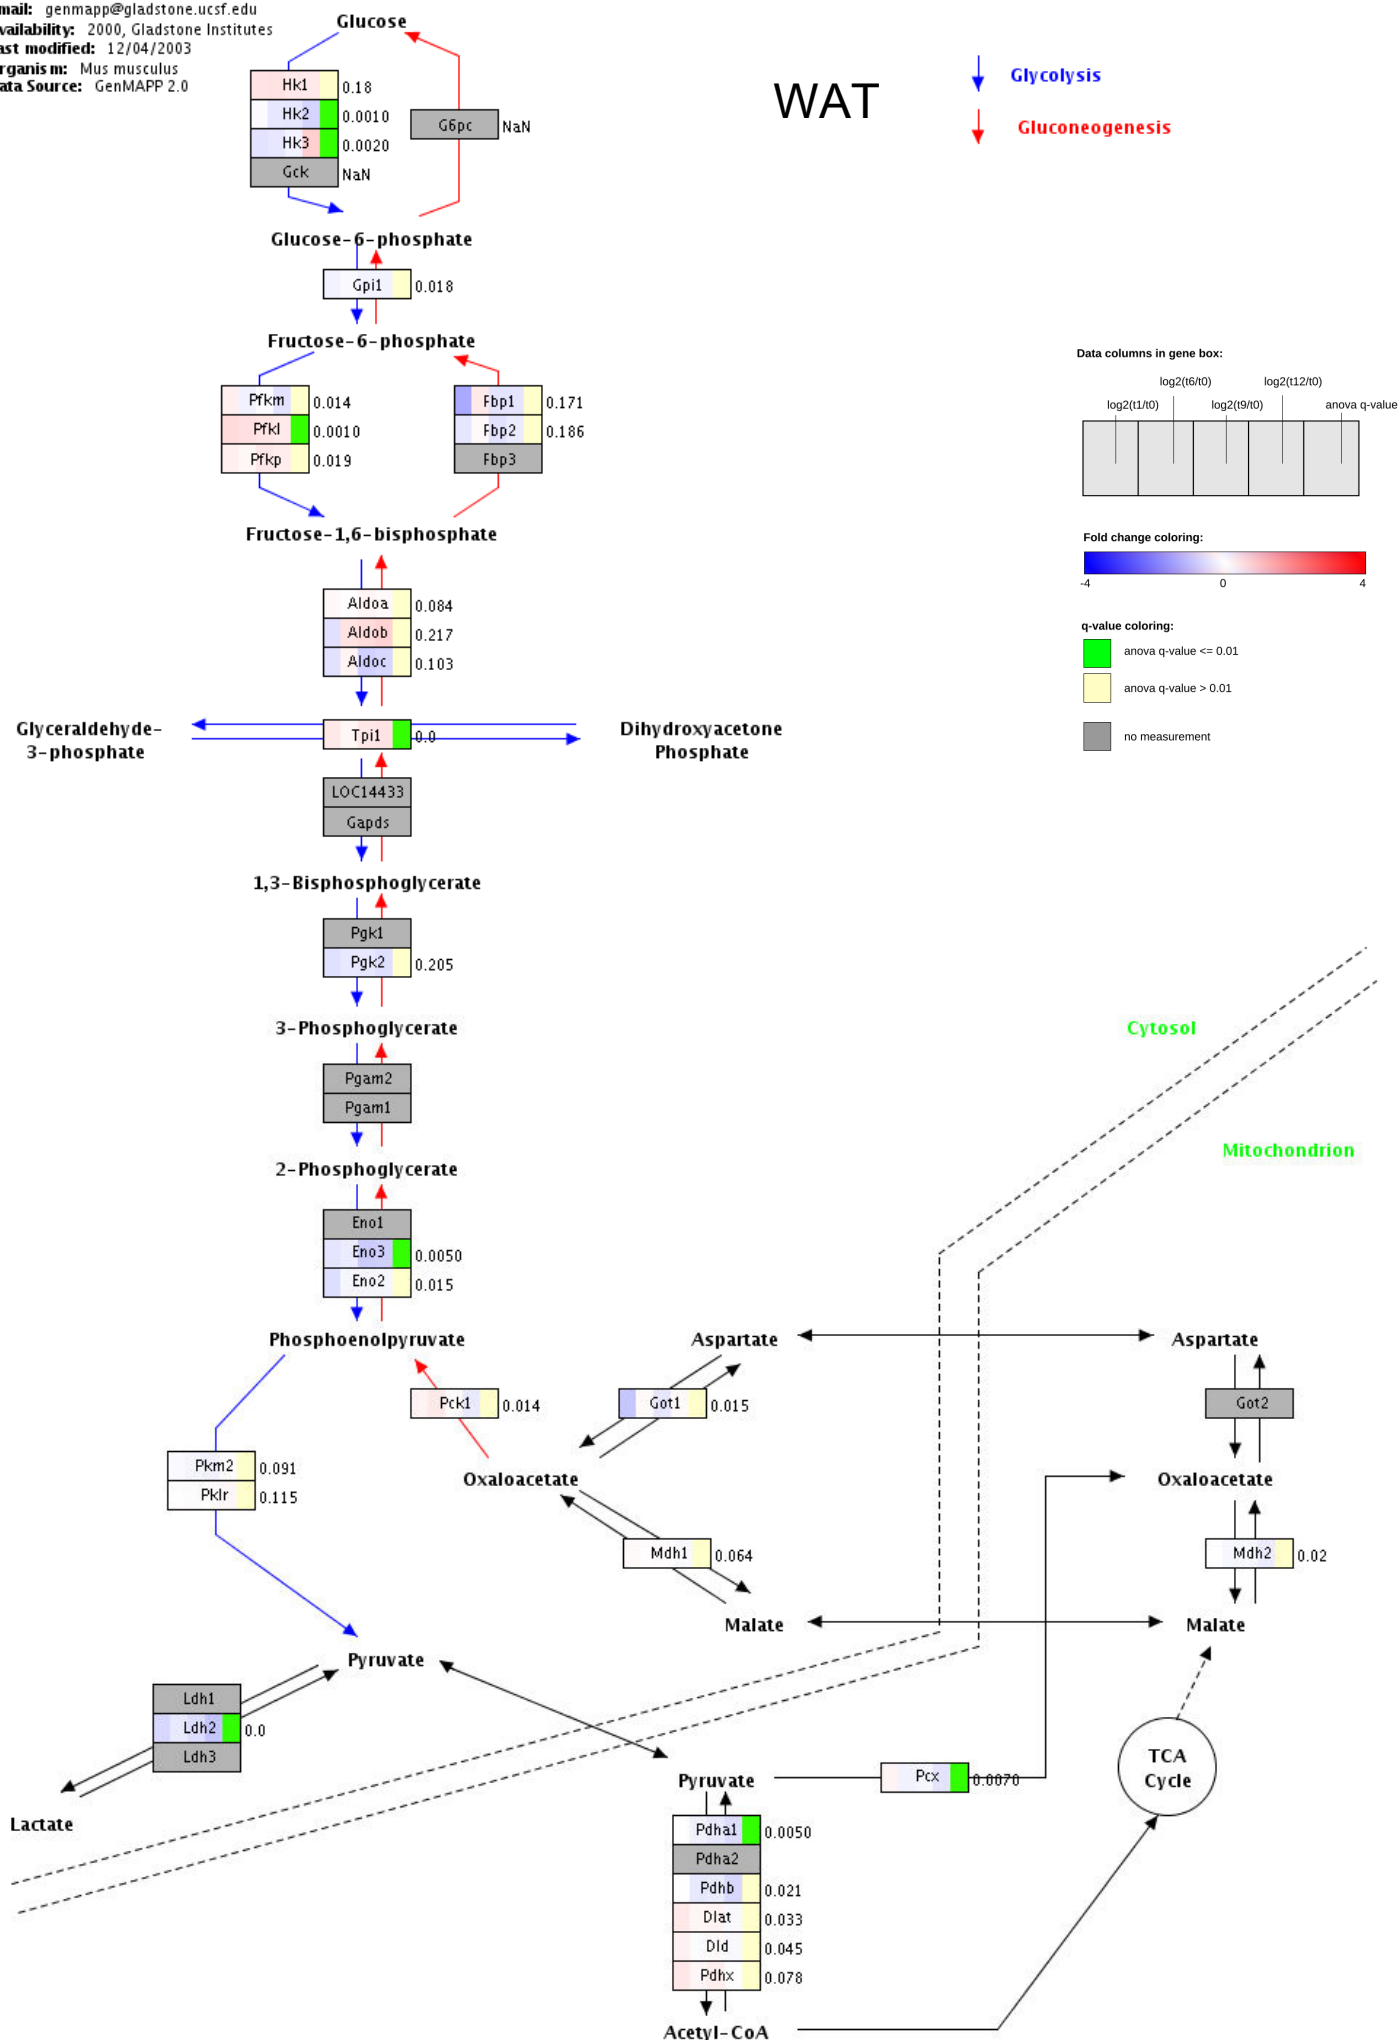

Supplement: Figure S1 — Targeted analysis of genes in pathways. The gene expression changes of glycolysis and gluconeogenesis genes are shown for liver, muscle, and white adipose tissue. Individual gene expression was statistically compared to the expression level at t = 0, and coloring indicates fold change and significance (green = significant in ANOVA; P≤.01). (0.41 MB PDF) [file pone.0008817.s004.pdf]
