# Supplementary material for: Time-Resolved and Tissue-Specific Systems Analysis of the Pathogenesis of Insulin Resistance
Source: PubMed Central journal article supplement (PMC2809107; doi:10.1371/journal.pone.0008817), 2010-01-21
Supplement: pone.0008817.s001.pdf [file pone.0008817.s001.pdf]

4031,05

Reference diet / high fat (rundvet)

| Samenstelling             | Aandeel |
|---------------------------|---------|
| 8500 STAND.VIT.PREMIX     | 0,30    |
| 8503 ST.SPOR.PREMIX       | 0,30    |
| 7559 CaHPO4.2H2O (LAAG F) | 1,60    |
| 7560 CaCO3 REINST/Me.2069 | 1,20    |
| 7547 KH2PO4               | 0,87    |
| 7546 KCl.                 | 0,87    |
| 7083 ZOUT (GEZAKT).       | 0,37    |
| 7611 MgSO4.7H2O           | 0,50    |
| 7552 MgO SCHWER REINST    | 0,25    |
| 7082 METHIONINE SYNTH. DL | 0,30    |
| 7514 CHOLINE CL 50%       | 0,40    |
| 7599 ZURE CASEINE.        | 24,00   |
| 7579 MAISZETMEEL GEL INST | 18,67   |
| 7584 DICACEL2+4/cellulose | 6,00    |
| 7519 RUNDVET              | 24,00   |
| 7060 CERELOSE/dextrose    | 20,38   |
|                           | 100,00  |

| Analyse     | Eenheid | Aandeel |
|-------------|---------|---------|
| 1 Cr.Prot   | g/kg    | 214,41  |
| 2 Cr. Fat   | g/kg    | 240,00  |
| 3 Cr.Fiber  | g/kg    | 61,57   |
| 4 Minerals  | g/kg    | 22,45   |
| 5 Moisture  | g/kg    | 57,65   |
| 6 Sug.+St.  | g/kg    | 350,46  |
| 7 Nfree ex  | g/kg    | 368,47  |
| 8 Dry Mat.  | g/kg    | 938,87  |
| 9 Lysine    | g/kg    | 14,90   |
| 10 Methion. | g/kg    | 8,73    |
| 12 Cystine  | g/kg    | 0,62    |
| 13 Threonin | g/kg    | 8,54    |
| 14 Tryptoph | g/kg    | 2,78    |
| 15 Isoleuc. | g/kg    | 12,10   |
| 16 Arginine | g/kg    | 7,34    |
| 17 Phenylal | g/kg    | 8,74    |
| 18 Histidin | g/kg    | 5,57    |
| 19 Leucine  | g/kg    | 22,85   |
| 20 Tyrosine | g/kg    | 11,33   |
| 21 Valine   | g/kg    | 14,11   |
| 22 Alanine  | g/kg    | 4,75    |
| 23 Asp.acid | g/kg    | 11,11   |
| 24 Glut.ac. | g/kg    | 42,12   |
| 25 Glycine  | g/kg    | 6,14    |
| 26 Proline  | g/kg    | 19,27   |
| 28 Serine   | g/kg    | 6,74    |
| 30 Calcium  | g/kg    | 8,63    |
| 31 Phos.tot | g/kg    | 5,17    |
| 34 Potass.  | g/kg    | 7,04    |
| 35 Magnes.  | g/kg    | 1,96    |
| 36 Sodium   | g/kg    | 1,41    |
| 37 Chlorine | g/kg    | 6,73    |
| 38 Sulfur   | g/kg    | 0,68    |

|              |      |          |
|--------------|------|----------|
| 49 C8-C12:0  | g/kg | 0,72     |
| 50 C14:0     | g/kg | 8,16     |
| 51 C16:0     | g/kg | 61,68    |
| 52 C16:1     | g/kg | 7,68     |
| 53 C18:0     | g/kg | 50,88    |
| 54 C18:1     | g/kg | 88,80    |
| 55 C18:2     | g/kg | 7,68     |
| 56 C18:3     | g/kg | 1,92     |
| 57 C20-C22   | g/kg | 2,64     |
| 61 Vit. A    | IU/g | 21,60    |
| 63 Vit. D    | IU/g | 2,40     |
| 64 Vit. D3   | IU/g | 2,40     |
| 65 Vit. E    | mg.  | 75,20    |
| 67 Vit. K3   | mg.  | 12,00    |
| 68 Vit. B1   | mg.  | 24,00    |
| 69 Vit. B2   | mg.  | 13,87    |
| 70 Vit. B6   | mg.  | 18,40    |
| 71 Niacin    | mg.  | 47,04    |
| 72 Pant.ac.  | mg.  | 19,08    |
| 73 Vit.B12   | mcg. | 60,00    |
| 74 Folic.ac  | mg.  | 9,41     |
| 75 Choline   | mg.  | 1.491,56 |
| 76 Biotin    | mcg. | 367,98   |
| 77 Inositol  | mg.  | 599,97   |
| 82 Starch    | g/kg | 146,53   |
| 83 Sugars    | g/kg | 185,97   |
| 86 Lactose   | g/kg | 0,48     |
| 91 Cellulos  | g/kg | 54,00    |
| 93 Glucose   | g/kg | 189,93   |
| 96 Iron      | mg.  | 154,73   |
| 97 Mangan.   | mg.  | 76,20    |
| 98 Zinc      | mg.  | 62,89    |
| 99 Copper    | mg.  | 21,16    |
| 100 Cobalt   | mg.  | 0,17     |
| 101 Iodine   | mg.  | 0,57     |
| 102 Selenium | mg.  | 0,22     |
| 104 Chromium | mg.  | 0,59     |
| 105 Nickel   | mg.  | 0,08     |
| 107 Fluorine | mg.  | 2,57     |
| 109 Arsenic  | mg.  | 0,08     |
| 111 Lead     | mg.  | 0,96     |
| 113 Alumin.  | mg.  | 3,97     |
