# Supplementary material for: Time-Resolved and Tissue-Specific Systems Analysis of the Pathogenesis of Insulin Resistance
Source: PubMed Central journal article supplement (PMC2809107; doi:10.1371/journal.pone.0008817), 2010-01-21
Supplement: pone.0008817.s002.pdf [file pone.0008817.s002.pdf]

**Table S2. Saturated, monounsaturated and polyunsaturated fatty acids in plasma.****Circulating saturated fatty acids**

|                 | weeks | 0             | 12             |
|-----------------|-------|---------------|----------------|
| palmitic acid   | C16:0 | 10.6 ± 0.6    | 10.4 ± 0.4     |
| stearic acid    | C18:0 | 2.98 ± 0.15   | 4.58 ± 0.17*   |
| eicosanoic acid | C20:0 | 0.09 ± 0.01   | 0.08 ± 0.01    |
| behenic acid    | C22:0 | 0.039 ± 0.002 | 0.023 ± 0.003* |

**Circulating monounsaturated fatty acids**

|                  | weeks | 0             | 12            |
|------------------|-------|---------------|---------------|
| palmitoleic acid | C16:1 | 4.32 ± 0.64   | 3.60 ± 0.21   |
| oleic acid       | C18:1 | 10.08 ± 0.60  | 16.23 ± 0.70* |
| eicosenic acid   | C20:1 | 0.34 ± 0.04   | 0.57 ± 0.03*  |
| erucic acid      | C22:1 | 0.033 ± 0.004 | 0.035 ± 0.002 |

**Circulating polyunsaturated fatty acids n-3 PUFAs**

|                            | weeks     | 0             | 12             |
|----------------------------|-----------|---------------|----------------|
| α-linolenic acid           | C18:3 n-3 | 0.668 ± 0.053 | 0.072 ± 0.005* |
| stearidonic acid           | C18:4 n-3 | 0.035 ± 0.006 | 0.001 ± 0.000* |
| eicosatetraenoic acid      | C20:4 n-3 | 0.072 ± 0.009 | 0.054 ± 0.004  |
| EPA; eicosapentaenoic acid | C20:5n-3  | 0.113 ± 0.025 | 0.040 ± 0.002* |
| DHA; docosahexaenoic acid  | C22:6n-3  | 0.63 ± 0.08   | 0.65 ± 0.04    |

**Circulating polyunsaturated fatty acids n-6 PUFAs**

|                         | weeks     | 0             | 12             |
|-------------------------|-----------|---------------|----------------|
| linoleic acid           | C18:2 n-6 | 7.70 ± 0.30   | 1.83 ± 0.12*   |
| gamma-linolenic acid    | C18:3 n-6 | 0.201 ± 0.020 | 0.035 ± 0.002* |
| dihomo-γ-linolenic acid | C20:3 n-6 | 0.032 ± 0.004 | 0.580 ± 0.035* |
| arachidonic acid        | C20:4 n-6 | 1.04 ± 0.10   | 0.98 ± 0.07    |
| adrenic acid            | C22:4 n-6 | 0.088 ± 0.007 | 0.032 ± 0.002* |

Quantitative, LC/MS-based lipidomics analysis of defined fatty acids in plasma over time.

Plasma of the same animals used for microarray analysis were used. Data presented are relative units and provided as means±SEM. \*P<0.05 compared to t=0.
