# Supplementary material for: Time-Resolved and Tissue-Specific Systems Analysis of the Pathogenesis of Insulin Resistance
Source: PubMed Central journal article supplement (PMC2809107; doi:10.1371/journal.pone.0008817), 2010-01-21
Supplement: pone.0008817.s003.pdf [file pone.0008817.s003.pdf]

**Table S3. Saturated, monounsaturated and polyunsaturated fatty acids in white adipose tissue.**

**Intra-WAT saturated fatty acids**

|                 | weeks | 0             | 12            |
|-----------------|-------|---------------|---------------|
| myristic acid   | C14:0 | 0.38±0.05     | 0.47±0.04     |
| palmitic acid   | C16:0 | 2.99±0.18     | 3.14 ± 0.30   |
| stearic acid    | C18:0 | 0.52±0.01     | 0.72 ± 0.05*  |
| eicosanoic acid | C20:0 | 0.017 ± 0.004 | 0.015 ± 0.001 |

**Intra-WAT monounsaturated fatty acids**

|                  | weeks | 0             | 12             |
|------------------|-------|---------------|----------------|
| palmitoleic acid | C16:1 | 1.43 ± 0.19   | 1.58 ± 0.18    |
| oleic acid       | C18:1 | 4.00± 0.32    | 6.46 ± 0.71*   |
| eicosenic acid   | C20:1 | 0.002 ± 0.001 | 0.003 ± 0.001* |
| erucic acid      | C22:1 | 0.006 ± 0.001 | 0.004 ± 0.001  |

**Intra-WAT polyunsaturated fatty acids n-3 PUFAs**

|                            | weeks     | 0               | 12              |
|----------------------------|-----------|-----------------|-----------------|
| α-linolenic acid           | C18:3 n-3 | 0.279 ± 0.030   | 0.035 ± 0.005*  |
| stearidonic acid           | C18:4 n-3 | 0.0011 ± 0.0005 | 0.0001± 0.0001* |
| eicosatetraenoic acid      | C20:4 n-3 | 0.004 ± 0.001   | 0.002 ± 0.001*  |
| EPA; eicosapentaenoic acid | C20:5n-3  | 0.007 ± 0.001   | 0.003 ± 0.001*  |
| DHA; docosahexaenoic acid  | C22:6n-3  | 0.023 ± 0.003   | 0.009 ± 0.001*  |

**Intra-WAT polyunsaturated fatty acids n-6 PUFAs**

|                         | weeks     | 0             | 12             |
|-------------------------|-----------|---------------|----------------|
| linoleic acid           | C18:2 n-6 | 3.50 ± 0.30   | 0.72 ± 0.09*   |
| gamma-linolenic acid    | C18:3 n-6 | 0.024 ± 0.003 | 0.004 ± 0.001* |
| dihomo-γ-linolenic acid | C20:3 n-6 | 0.004 ± 0.001 | 0.020 ± 0.002* |
| arachidonic acid        | C20:4 n-6 | 0.066 ± 0.007 | 0.025 ± 0.008* |
| adrenic acid            | C22:4 n-6 | 0.006 ± 0.001 | 0.003 ± 0.001* |

Quantitative, LC/MS-based lipidomics analysis of defined fatty acids in WAT over time. WAT of the same animals used for microarray analysis were used. Data presented are relative units and provided as means±SEM. \*P<0.05 compared to t=0.
