# Supplementary material for: Time-Resolved and Tissue-Specific Systems Analysis of the Pathogenesis of Insulin Resistance
Source: PubMed Central journal article supplement (PMC2809107; doi:10.1371/journal.pone.0008817), 2010-01-21

Figure S2

SOCS-3

PTP1B

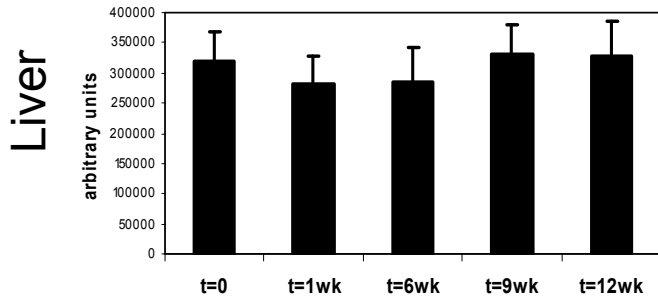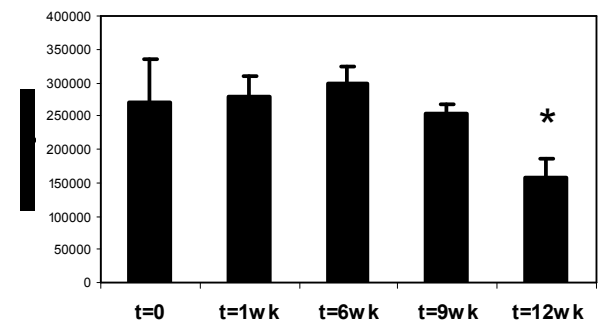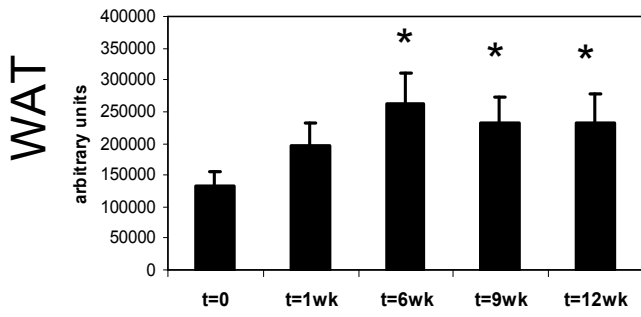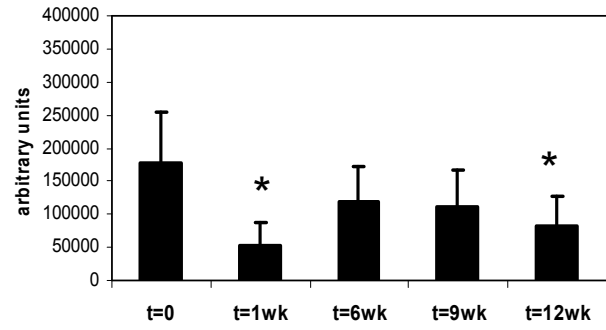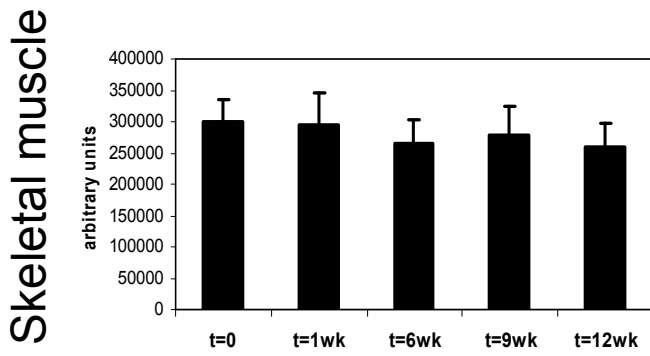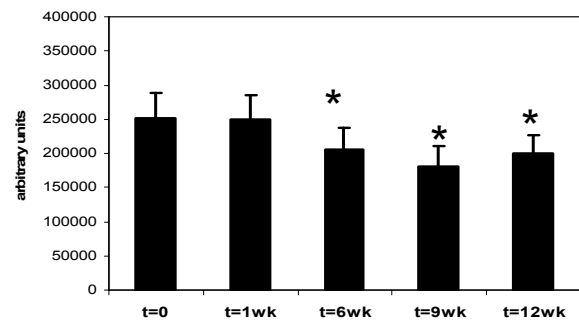

Supplement: pone.0008817.s005.pdf [file pone.0008817.s005.pdf]
